# Supplementary material for: Patient-reported questionnaires in MS rehabilitation: responsiveness and minimal important difference of the multiple sclerosis questionnaire for physiotherapists (MSQPT)
Source: Springer Nature journal article supplement (doi:10.1186/s12883-017-0834-1), 2017-03-16

# MSQPT®

Multiple Sclerosis Questionnaire for Physiotherapists Patienten-Fragebogen zur Therapieevaluation

Wir möchten Ihnen die bestmögliche Therapie anbieten. Zum besseren Verständnis Ihrer Fähigkeiten und Einschränkungen haben wir einen Fragebogen ausgearbeitet, in dem Sie Ihren momentanen Zustand selbst einschätzen können. Damit helfen Sie uns, die Therapie Ihren persönlichen Bedürfnissen anzupassen. Ihre Angaben sind nur Ihrer Therapeutin bzw. Ihrem Therapeuten zugänglich und werden vertraulich behandelt.

Bitte bestimmen Sie selbst, wie weit die unten aufgeführten Aussagen für Sie übereinstimmen. Bei allen Aktivitäten spielt es keine Rolle, ob Sie Hilfsmittel benutzen oder nicht. Sie müssen es aber ohne Hilfe weiterer Personen ausführen können.

Bitte kreuzen Sie für jede Aussage und jede Frage die Zahl an, die am ehesten zutrifft.

Bei Unklarheiten wenden Sie sich bitte an Ihre Therapeutin bzw. Ihren Therapeuten.

Es gibt keine richtigen oder falschen Antworten sondern nur Ihre persönliche Einschätzung.

Herzlichen Dank für Ihre wertvolle Mitarbeit.

Hier ein Beispiel:

1. Ich kann ein Telefon bedienen.

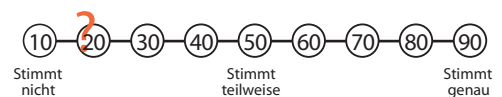

“10” bedeutet dabei “stimmt nicht”,  
“50” bedeutet “stimmt teilweise”, und  
“90” bedeutet “stimmt genau”.

Diese Person ist eher nicht der Meinung, dass sie ein Telefon bedienen kann.

**Bearbeiten Sie bitte jetzt folgende Fragen und Aussagen.**

# MSQPT®

Multiple Sclerosis Questionnaire for Physiotherapists Patienten-Fragebogen zur Therapieevaluation

Name des Patienten/der Patientin: \_\_\_\_\_

Physiotherapeut/Physiotherapeutin: \_\_\_\_\_

Physiotherapie seit: \_\_\_\_\_

Untersuchungsdatum: \_\_\_\_\_

*Bitte beachten Sie, dass es keine Rolle spielt, ob Sie Hilfsmittel benützen oder nicht.  
Sie müssen es aber ohne Hilfe weiterer Personen ausführen können.*

1 Im Vergleich zu der Situation vor einem halben Jahr,  
wie würden Sie Ihre Gesundheitssituation beschreiben?

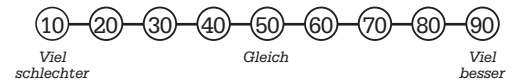

2 Wenn ich morgens aufwache, fühle ich mich ausgeruht.

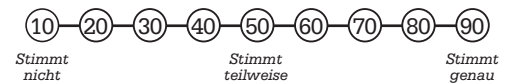

3 Ich kann mich ohne Hilfe anziehen.

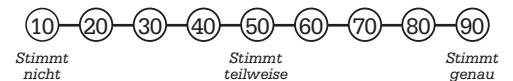

4 Ich kann selbstständig duschen.

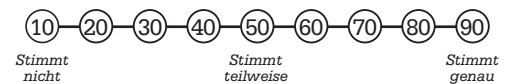

5 Ich kann selbstständig ein Bad nehmen.

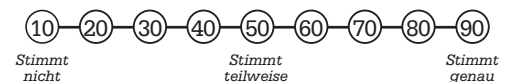

6 Ich habe Mühe beim Zähne putzen.

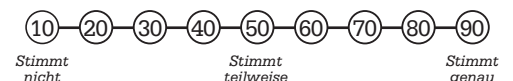

7 Ich habe Schwierigkeiten sicher zu stehen.

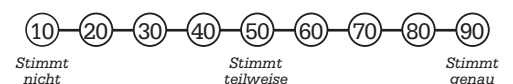

8. A. Wie **weit** können Sie ohne Sitzpause auf flachem Boden gehen?

- 0 – 3 m       3 – 10 m       10 – 50 m       50 – 100 m  
 100 – 500 m       500 – 1000 m       1 – 2 km       2 – 5 km       über 5 km

B. Wie **lange** können Sie ohne Sitzpause auf flachem Boden gehen?

- 0 – 1 Min.       1 – 3 Min.       3 – 5 Min.       5 – 7 Min.       7 – 10 Min.  
 10 – 20 Min.       20 – 30 Min.       30 – 60 Min.       1 bis 2 Std.       über 2 Std.

9 ► Eine Treppe zwischen 2 Stockwerken hat 14 bis 16 Stufen.

Bitte schätzen Sie, wie viele Stufen Sie ungefähr hinuntergehen können.

A. Wie viele Treppenstufen können Sie **hinuntergehen**?

- 0 – 9       10 – 19       20 – 29       30 – 39       40 – 49  
 50 – 59       60 – 69       70 – 79       80 – 89       über 90

B. Wie viele Treppenstufen können Sie **hinaufgehen**?

- 0 – 9       10 – 19       20 – 29       30 – 39       40 – 49  
 50 – 59       60 – 69       70 – 79       80 – 89       über 90

10 Ich kann selbstständig in ein Auto ein- bzw. aussteigen.

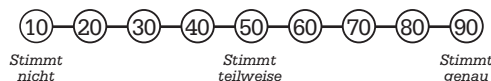

11 Ich kann selbstständig öffentliche Verkehrsmittel benutzen.

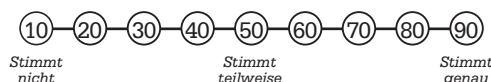

12 ► Im Folgenden sind einige Tätigkeiten beschrieben, die Sie vielleicht an einem normalen Tag ausüben.

Wie stark sind Sie durch Ihren derzeitigen Gesundheitszustand bei diesen Tätigkeiten eingeschränkt?

A. Wie stark sind Sie eingeschränkt bei anstrengenden Tätigkeiten wie z. B. schnell laufen, schwere Gegenstände heben, anstrengenden Sport treiben?

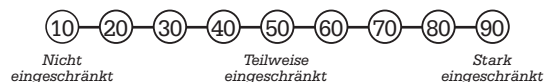

B. Wie stark sind Sie eingeschränkt bei mittelschweren Tätigkeiten wie z. B. einen Tisch verschieben oder staubsaugen.

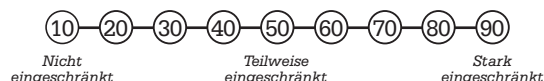

C. Wie stark sind Sie eingeschränkt bei Einkaufstaschen heben oder tragen?

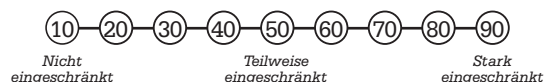

13 Ich habe beim Schreiben ...

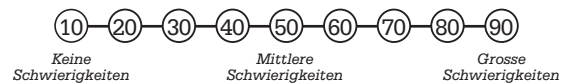

14 Ich fühle mich vital und habe Energie.

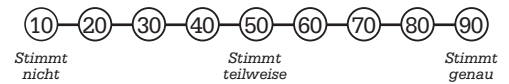

*Bitte beachten Sie, dass es keine Rolle spielt, ob Sie Hilfsmittel benützen oder nicht.  
 Sie müssen es aber ohne Hilfe weiterer Personen ausführen können.*

15 Ich habe Probleme mit dem Gleichgewicht.

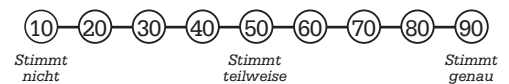

16 A. Spastizität ist eines meiner Symptome.

- Ja → beantworten Sie bitte Frage 16 B.
- Nein

B. Ich kann die Spastizität beeinflussen.

► Die Beeinflussung der Spastizität durch  
 Medikamente ist bei dieser Frage ausgeschlossen.

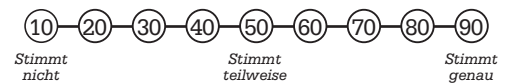

17 Ich habe genügend körperliche Kraft,  
 um meinen Alltag zu bewältigen.

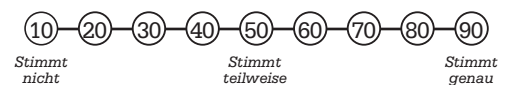

18 Wie gross ist Ihre Ermüdbarkeit?

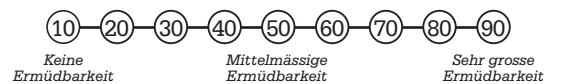

19 Ich kann meine Ermüdung kontrollieren.

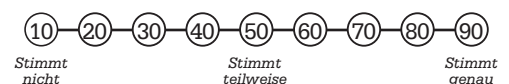

20 Ich habe Schmerzen, die mich stören.

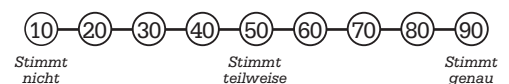

21 Gefühlsstörungen beeinträchtigen mich im Alltag.

► Diese Frage bezieht sich auf  
 körperliche Empfindungen.

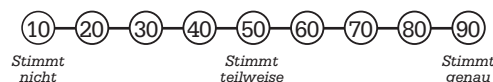

22 Ich kann Aktivitäten ausüben, die ich gerne habe.

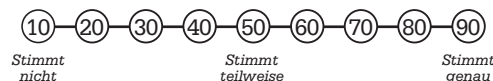

23 Ich kann meine Aktivitäten gezielt einteilen,  
 um meine Symptome der MS nicht zu verschlimmern.

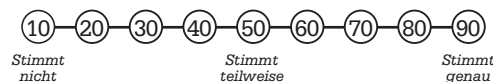

24 Die Blase macht mir Probleme.

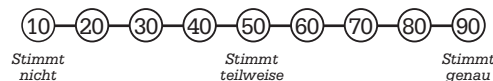

25 Ich habe Probleme mit dem Stuhlgang.

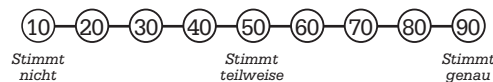

26 Im Alltag fühle ich mich belastbar.

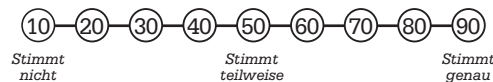

27 Ich kann am Familienleben und im Freundeskreis  
 aktiv teilnehmen.

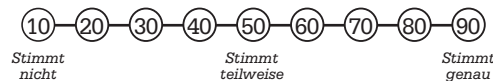

28 Ich kann einen Ausflug machen, der mich den  
 ganzen Tag von zu Hause fern hält.

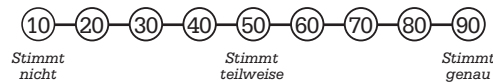

29 Ich habe Angst vor möglichen Folgen der MS.

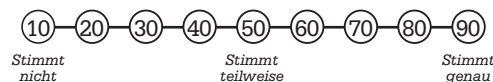

30 Ich habe konkrete Ziele, an denen ich gerne arbeite.

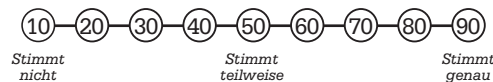

Supplement: MOESM1 [file 12150042]
